# Supplementary material for: Association between Official Development Assistance for Water and Sanitation and Countries’ Needs from 2002 to 2019
Source: MDPI journal article supplement (doi:10.3390/ijerph191711134), 2022-09-05
Supplement: s1 [file s1]

**Table S1.** Country code

| Country (country code)                    |                                      |                      |
|-------------------------------------------|--------------------------------------|----------------------|
| Afghanistan(AF)                           | Democratic Republic of the Congo(CD) |                      |
| Albania(AL)                               | Djibouti(DJ)                         | Liberia(LR)          |
| Algeria(DZ)                               | Dominica(DM)                         | Libya(LY)            |
| Angola(AO)                                | Dominican Republic(DO)               | Madagascar(MG)       |
|                                           | Ecuador(EC)                          | Malawi(MW)           |
| Argentina(AR)                             | Egypt(EG)                            | Malaysia(MY)         |
| Armenia(AM)                               | El Salvador(SV)                      | Maldives(MV)         |
| Azerbaijan(AZ)                            | Equatorial Guinea(GQ)                | Mali(ML)             |
| Bangladesh(BD)                            | Eritrea(ER)                          | Marshall Islands(MH) |
|                                           | Eswatini(SZ)                         | Mauritania(MR)       |
| Belarus(BY)                               | Ethiopia(ET)                         | Mauritius(MU)        |
| Belize(BZ)                                | Fiji(FJ)                             | Mexico(MX)           |
| Benin(BJ)                                 | Gabon(GA)                            | Micronesia(FM)       |
| Bhutan(BT)                                | Gambia(GM)                           | Moldova(MD)          |
| Bolivia(BO)                               | Georgia(GE)                          | Mongolia(MN)         |
| Bosnia and Herzegovina(BA)                | Ghana(GH)                            | Montenegro(ME)       |
| Botswana(BW)                              | Grenada(GD)                          | Morocco(MA)          |
| Brazil(BR)                                | Guatemala(GT)                        | Mozambique(MZ)       |
| Burkina Faso(BF)                          | Guinea(GN)                           | Myanmar(MM)          |
| Burundi(BI)                               | Guinea-Bissau(GW)                    | Namibia(NA)          |
| Cabo Verde(CV)                            | Guyana(GY)                           |                      |
| Cambodia(KH)                              | Haiti(HT)                            | Nepal(NP)            |
| Cameroon(CM)                              | Honduras(HN)                         | Nicaragua(NI)        |
| Central African Republic(CF)              | India(IN)                            | Niger(NE)            |
| Chad(TD)                                  | Indonesia(ID)                        | Nigeria(NG)          |
|                                           | Iran(IR)                             | North Macedonia(MK)  |
| China(CN)                                 | Iraq(IQ)                             |                      |
| Colombia(CO)                              | Jamaica(JM)                          | Pakistan(PK)         |
| Comoros(KM)                               | Jordan(JO)                           |                      |
| Congo(CG)                                 | Kazakhstan(KG)                       | Panama(PA)           |
| Costa Rica(CR)                            | Kenya(KE)                            | Papua New Guinea(PG) |
| Côte d'Ivoire(CI)                         | Kiribati(KI)                         | Paraguay(PY)         |
|                                           | Kyrgyzstan(KG)                       | Peru(PE)             |
| Cuba(CU)                                  | Lao People's Democratic Republic(LA) | Philippines(PH)      |
| Democratic People's Republic of Korea(KP) | Lebanon(LB)                          | Rwanda(RW)           |
|                                           | Lesotho(LS)                          | Samoa(WS)            |

|                              |  |                           |
|------------------------------|--|---------------------------|
|                              |  | Sao Tome and Principe(ST) |
|                              |  |                           |
| Senegal(SN)                  |  |                           |
| Serbia(RS)                   |  |                           |
|                              |  |                           |
| Sierra Leone(SL)             |  |                           |
| Solomon Islands(SB)          |  |                           |
| Somalia(SO)                  |  |                           |
| South Africa(ZA)             |  |                           |
| South Sudan(SS)              |  |                           |
| Sri Lanka(LK)                |  |                           |
| Sudan(SD)                    |  |                           |
| Suriname(SR)                 |  |                           |
| Syrian Arab Republic(SY)     |  |                           |
| Tajikistan(TJ)               |  |                           |
| Tanzania(TZ)                 |  |                           |
| Thailand(TH)                 |  |                           |
| Timor-Leste(TL)              |  |                           |
| Togo(TG)                     |  |                           |
| Tonga(TO)                    |  |                           |
| Tunisia(TN)                  |  |                           |
| Turkey(TR)                   |  |                           |
| Turkmenistan(TM)             |  |                           |
| Tuvalu(TV)                   |  |                           |
| Uganda(UG)                   |  |                           |
| Ukraine(UA)                  |  |                           |
|                              |  |                           |
| Uzbekistan(UZ)               |  |                           |
| Vanuatu(VU)                  |  |                           |
| Venezuela(VE)                |  |                           |
| Viet Nam(VN)                 |  |                           |
| West Bank and Gaza Strip(PS) |  |                           |
| Yemen(YE)                    |  |                           |
| Zambia(ZM)                   |  |                           |
| Zimbabwe(ZW)                 |  |                           |

**Table S2.** Associations between ODA per capita and coverage of water and sanitation

| <b>Correlation</b>                |                            |                 |                 |
|-----------------------------------|----------------------------|-----------------|-----------------|
| <b>Dependent</b>                  | <b>Independent</b>         | <b><i>r</i></b> | <b><i>p</i></b> |
| <b>ln (ODA per capita, basic)</b> | <b>Water coverage</b>      |                 |                 |
| basic water, 2010                 | At least basic, 2010       | -0.016          | 0.87            |
| basic water, 2011                 | At least basic, 2011       | -0.039          | 0.70            |
| basic water, 2012                 | At least basic, 2012       | -0.020          | 0.84            |
| basic water, 2013                 | At least basic, 2013       | 0.008           | 0.93            |
| basic water, 2014                 | At least basic, 2014       | -0.022          | 0.82            |
| basic water, 2015                 | At least basic, 2015       | -0.044          | 0.66            |
| basic water, 2016                 | At least basic, 2016       | -0.104          | 0.30            |
| basic water, 2017                 | At least basic, 2017       | -0.089          | 0.39            |
| basic water, 2018                 | At least basic, 2018       | -0.153          | 0.14            |
| basic water, 2019                 | At least basic, 2019       | -0.182          | 0.08            |
| basic water, 2010                 | Safely managed, 2010       | -0.024          | 0.86            |
| basic water, 2011                 | Safely managed, 2011       | -0.101          | 0.48            |
| basic water, 2012                 | Safely managed, 2012       | -0.011          | 0.93            |
| basic water, 2013                 | Safely managed, 2013       | 0.011           | 0.94            |
| basic water, 2014                 | Safely managed, 2014       | -0.013          | 0.93            |
| basic water, 2015                 | Safely managed, 2015       | -0.018          | 0.89            |
| basic water, 2016                 | Safely managed, 2016       | -0.041          | 0.76            |
| basic water, 2017                 | Safely managed, 2017       | -0.028          | 0.84            |
| basic water, 2018                 | Safely managed, 2018       | -0.011          | 0.94            |
| basic water, 2019                 | Safely managed, 2019       | -0.068          | 0.62            |
| <b>ln (ODA per capita, basic)</b> | <b>Sanitation coverage</b> |                 |                 |
| basic sanitation, 2010            | At least basic, 2010       | -0.127          | 0.22            |
| basic sanitation, 2011            | At least basic, 2011       | -0.146          | 0.16            |
| basic sanitation, 2012            | At least basic, 2012       | -0.062          | 0.56            |
| basic sanitation, 2013            | At least basic, 2013       | -0.068          | 0.49            |
| basic sanitation, 2014            | At least basic, 2014       | -0.107          | 0.29            |
| basic sanitation, 2015            | At least basic, 2015       | -0.081          | 0.44            |
| basic sanitation, 2016            | At least basic, 2016       | -0.132          | 0.20            |
| basic sanitation, 2017            | At least basic, 2017       | -0.153          | 0.14            |
| basic sanitation, 2018            | At least basic, 2018       | -0.175          | 0.09            |
| basic sanitation, 2019            | At least basic, 2019       | -0.174          | 0.09            |
| basic sanitation, 2010            | Safely managed, 2010       | 0.038           | 0.79            |
| basic sanitation, 2011            | Safely managed, 2011       | -0.132          | 0.35            |

|                        |                      |        |      |
|------------------------|----------------------|--------|------|
| basic sanitation, 2012 | Safely managed, 2012 | -0.135 | 0.36 |
| basic sanitation, 2013 | Safely managed, 2013 | -0.184 | 0.18 |
| basic sanitation, 2014 | Safely managed, 2014 | -0.191 | 0.17 |
| basic sanitation, 2015 | Safely managed, 2015 | -0.183 | 0.18 |
| basic sanitation, 2016 | Safely managed, 2016 | -0.206 | 0.13 |
| basic sanitation, 2017 | Safely managed, 2017 | -0.224 | 0.11 |
| basic sanitation, 2018 | Safely managed, 2018 | -0.207 | 0.14 |
| basic sanitation, 2019 | Safely managed, 2019 | -0.199 | 0.16 |

---

Covariate: GNI per capita; ODA=official development assistance

---
